# Supplementary material for: In Vivo Expression of Reprogramming Factors Increases Hippocampal Neurogenesis and Synaptic Plasticity in Chronic Hypoxic-Ischemic Brain Injury
Source: PubMed Central journal article supplement (PMC5120183; doi:10.1155/2016/2580837), 2016-11-09
Supplement: 2580837.f1.pdf [file 2580837.f1.pdf]

## Supplementary Figures

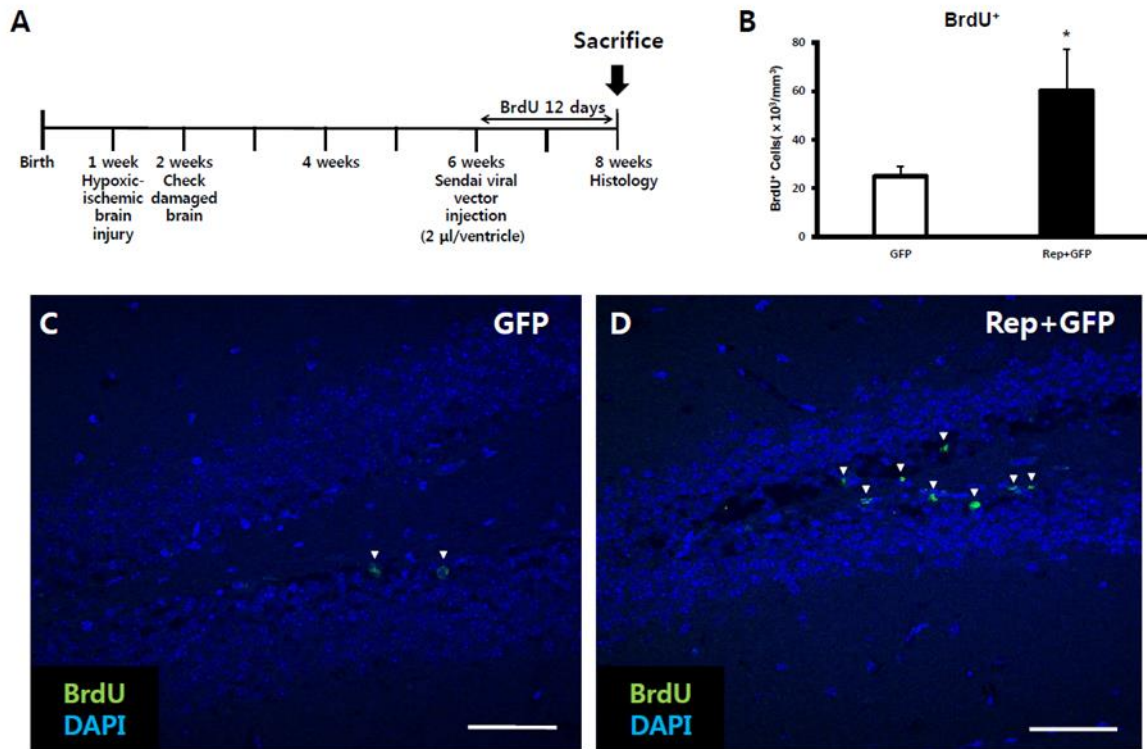

**Figure S1. The number of BrdU<sup>+</sup> cells in the hippocampus two weeks after the surgical treatment in chronic hypoxic-ischemic brain injury.** (A) Schematic timeline of the experiment. (B) The density of BrdU<sup>+</sup> cells in the hippocampus was significantly higher in the treatment group than the control group ( $t = 2.349$ ,  $p < 0.05$ ). (C) The hippocampus of GFP control group. (D) The hippocampus of treatment group. Both C and D are images of immunohistochemistry results by confocal microscope. Cells with double positive for DAPI, BrdU are indicated by the white arrow. Scale bars = 50  $\mu$ m.

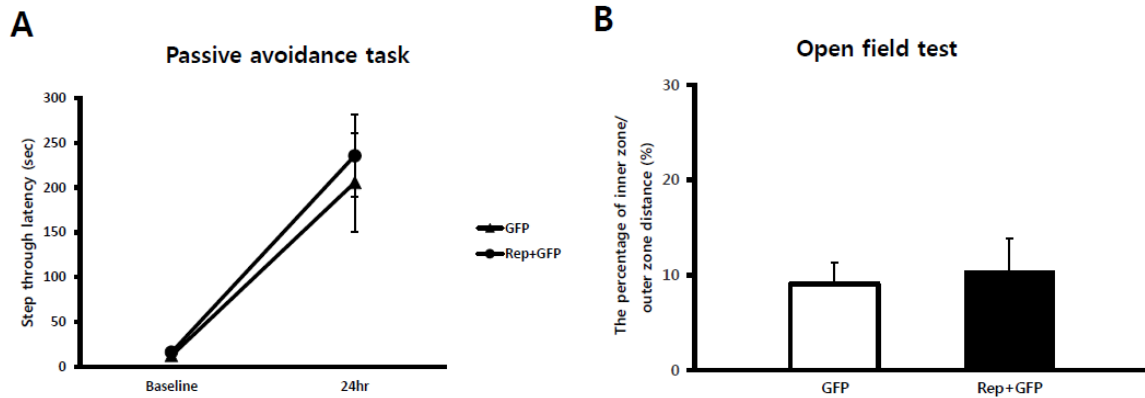

**Figure S2. Effects of reprogramming factor expression on neurobehavioral functions in the sham-operated control group and treatment group.** (A) Passive avoidance task result showed that there was no significant difference between sham-operated control group ( $205.7 \pm 55.7$  seconds) and treatment group ( $235.7 \pm 45.7$  seconds) ( $n = 6$  per group). (B) Open field test result showed that there was no significant difference between sham-operated control group ( $9.1 \pm 2.0\%$ ) and treatment group ( $10.3 \pm 3.3\%$ ) ( $n = 6$  per group).
